# Supplementary material for: Understanding ion-transfer reactions in silver electrodissolution and electrodeposition from first-principles calculations and experiments
Source: Royal Society of Chemistry journal article supplement (doi:10.1039/d3sc05791g), 2024-01-01
Supplement: d3sc05791g1.zip [file d3sc05791g1.zip]

## Sheet: Table of Contents
	Note/Explanation
Ag25 Corrosion	CEP optimized energy/charge data for Ag25 corrosion/deposition
Ag24 Corrosion	CEP optimized energy/charge data for Ag24 corrosion/deposition. The data without any background color corresponds to the defect formation pathway. The data with a grey background correponds to the vertical displacement pathway.
Ag28 Corrosion	CEP optimized energy/charge data for Ag28 corrosion/deposition.
Hydration Energy	Additional hydration energy gain by providing explicit first solvation shell on PCM/LPB. More information is provided in SI.
Ag25 BV Fit	Linear fit data used for fitting to the Butler-Volmer model. Residuals and fit data are provided.
Fully Implicit Ag25	Free energy data solely using the implicit solvation/electrolyte model is provided.
Dispersion Correction Test	Free energy data using DFT-D3(0) and DFT-HI/TS dispersion corrections are provided.

## Sheet: Ag25 corrosion
Ag25 1.00V			*Total charge of the cell is the negative of the net number of electrons.								Partial charges
Distance (z, Å)	Electronic Energy (eV)	No. of electrons	Net No. electrons	Fermi Level (eV)	Fermi_SHIFT (eV)	Voltage (V)	Free Energy (G, eV)	ΔG (eV)	ΔG[Ag+](eV)	ΔG_depo (eV)	Solvation shell	Bulk	Sum of nearest neighbors		*Sum of solvation shell charge and bullk charge is equal to total cell charge.
0	-57.6576	287.186	-3.8137	-6.2425	0.812449	1.00005	-81.4646	0	-31.5184	0.213028	1.073	2.74	0.506
0.25	-56.5169	287.005	-3.9955	-6.2424	0.812417	0.999983	-81.4584	0.00619613	-31.5122	0.219224	1.129	2.87	0.702		ΔG (eV)	Free energy difference, with respect to 0Å structure
0.5	-56.0213	286.925	-4.0755	-6.2424	0.812416	0.999984	-81.4622	0.00241088	-31.516	0.215439	1.14	2.938	0.83		ΔG[Ag+](eV)	Free energy of departing solvation shell only
0.75	-55.8787	286.903	-4.0974	-6.2425	0.812453	1.00005	-81.4568	0.00787884	-31.5105	0.220907	1.121	2.978	0.914		ΔG_depo (eV)	Free energy difference, with respect to 6Å structure
1	-55.8411	286.899	-4.1005	-6.2424	0.812445	0.999955	-81.4381	0.0265314	-31.4919	0.239559	1.095	3.004	0.972
1.25	-55.7162	286.883	-4.1168	-6.2424	0.812421	0.999979	-81.415	0.0496868	-31.4687	0.262715	1.068	3.008	1.042
1.3	-55.7719	286.893	-4.1069	-6.2425	0.812445	1.00005	-81.4092	0.0554561	-31.4629	0.268484	1.052	3.055	1.05
1.4	-55.8546	286.908	-4.0917	-6.2425	0.812443	1.00006	-81.3971	0.0675563	-31.4508	0.280584	1.042	3.05	1.04
1.5	-56.0926	286.945	-4.0545	-6.2424	0.812417	0.999983	-81.4024	0.0622767	-31.4561	0.275305	1.054	3.001	0.946
1.625	-55.9356	286.917	-4.0834	-6.2424	0.812441	0.999959	-81.4258	0.0388445	-31.4796	0.251873	1.045	3.037	1.014		+
1.75	-55.7506	286.882	-4.1185	-6.2425	0.812421	1.00008	-81.4603	0.00429661	-31.5141	0.217325	1.041	3.079	1.096
2	-55.5678	286.842	-4.158	-6.2425	0.812422	1.00008	-81.5241	-0.0594446	-31.5778	0.153584	1.034	3.125	1.19
2.25	-55.475	286.82	-4.1797	-6.2425	0.812423	1.00008	-81.5668	-0.102172	-31.6206	0.110856	1.029	3.154	1.238
2.5	-55.3977	286.803	-4.1965	-6.2425	0.812434	1.00007	-81.5943	-0.129671	-31.6481	0.0833575	1.024	3.174	1.27
3	-55.2796	286.78	-4.2204	-6.2424	0.812446	0.999954	-81.625	-0.160338	-31.6787	0.0526898	1.019	3.203	1.308
4	-55.1297	286.751	-4.2488	-6.2424	0.812448	0.999952	-81.6524	-0.18772	-31.7061	0.0253084	1.017	3.233	1.348
5	-55.0539	286.736	-4.2635	-6.2424	0.812418	0.999982	-81.6684	-0.203769	-31.7222	0.00925951	1.012	3.251	1.364
6	-55.0151	286.729	-4.2712	-6.2424	0.812449	0.999951	-81.6777	-0.213028	-31.7314	0	1.012	3.256	1.372
Ag(s)	-29.6066		-3.2853	-6.1911	0.761137	0.999963	-49.9462
Ag25 0.75V											Partial charges
Distance (z, Å)	Electronic Energy (eV)	No. of electrons	Net No. electrons	Fermi Level (eV)	Fermi_SHIFT (eV)	Voltage (V)	Free Energy (G, eV)	ΔG (eV)	ΔG[Ag+](eV)	ΔG_depo (eV)	Solvation shell	Bulk	Sum of nearest neighbors
0	-61.6009	287.829	-3.1705	-5.9924	0.812416	0.749984	-80.5998	0	-31.415	0.0691202	0.922	2.254	0.174
0.05	-60.3877	287.634	-3.366	-5.9925	0.812442	0.750058	-80.5584	0.0413306	-31.3737	0.110451	1.005	2.364	0.37
0.1	-60.1676	287.599	-3.4012	-5.9924	0.812425	0.749975	-80.549	0.0508195	-31.3642	0.11994	1.023	2.382	0.412
0.25	-59.6563	287.517	-3.4826	-5.9924	0.81244	0.74996	-80.5254	0.074325	-31.3407	0.143445	1.081	2.4	0.496
0.5	-59.0956	287.427	-3.5728	-5.9925	0.812417	0.750083	-80.5056	0.0941855	-31.3209	0.163306	1.107	2.465	0.638
0.75	-58.884	287.394	-3.6059	-5.9925	0.812434	0.750066	-80.4924	0.107371	-31.3077	0.176491	1.102	2.508	0.718
1	-58.839	287.39	-3.61	-5.9925	0.812417	0.750083	-80.4719	0.127844	-31.2872	0.196965	1.079	2.531	0.77
1.25	-58.902	287.404	-3.5957	-5.9924	0.812439	0.749961	-80.4488	0.150943	-31.2641	0.220063	1.058	2.537	0.782
1.5	-59.0046	287.421	-3.5785	-5.9924	0.812444	0.749956	-80.4484	0.151391	-31.2637	0.220512	1.049	2.533	0.752
1.75	-58.7038	287.365	-3.6354	-5.9924	0.812444	0.749956	-80.4886	0.111167	-31.3039	0.180287	1.04	2.594	0.872
2	-58.4984	287.322	-3.6785	-5.9925	0.812449	0.750051	-80.5418	0.0579909	-31.3571	0.127111	1.032	2.652	0.968
2.25	-58.3948	287.298	-3.7021	-5.9925	0.812441	0.750059	-80.5796	0.0201305	-31.3949	0.0892507	1.027	2.679	1.016
2.5	-58.3172	287.281	-3.7189	-5.9924	0.812415	0.749985	-80.6024	-0.00260554	-31.4176	0.0665147	1.024	2.696	1.046
3	-58.2043	287.258	-3.7419	-5.9924	0.812445	0.749955	-80.6272	-0.02745	-31.4425	0.0416702	1.02	2.72	1.082
4	-58.0649	287.231	-3.7687	-5.9925	0.812448	0.750052	-80.6488	-0.0490679	-31.4641	0.0200523	1.017	2.751	1.12
5	-57.9961	287.218	-3.7823	-5.9925	0.81245	0.75005	-80.6616	-0.0618021	-31.4768	0.00731813	1.012	2.769	1.136
6	-57.9619	287.211	-3.7893	-5.9924	0.812448	0.749952	-80.6689	-0.0691202	-31.4842	0	1.014	2.774	1.142
Ag(s)	-32.5327		-2.8028	-5.9412	0.761144	0.750056	-49.1847
Ag25 0.50V											Partial charges
Distance (z, Å)	Electronic Energy (eV)	No. of electrons	Net No. electrons	Fermi Level (eV)	Fermi_SHIFT (eV)	Voltage (V)	Free Energy (G, eV)	ΔG (eV)	ΔG[Ag+](eV)	ΔG_depo (eV)	Solvation shell	Bulk	Sum of nearest neighbors
0	-65.2843	288.457	-2.5434	-5.7424	0.812443	0.499957	-79.8896	0	-31.3462	-0.108585	0.852	1.692	-0.034
0.1	-65.2049	288.45	-2.5498	-5.7425	0.812448	0.500052	-79.8472	0.0424084	-31.3038	-0.0661765	0.829	1.723	0.046
0.2	-65.0437	288.432	-2.5681	-5.7424	0.812451	0.499949	-79.7907	0.0988564	-31.2474	-0.0097285	0.832	1.736	0.068
0.225	-65.0025	288.427	-2.5726	-5.7424	0.812417	0.499983	-79.7754	0.11416	-31.2321	0.00557537	0.832	1.737	0.074
0.25	-63.331	288.146	-2.8543	-5.7425	0.812422	0.500078	-79.7218	0.167722	-31.1785	0.0591373	0.989	1.865	0.234
0.3	-62.7146	288.041	-2.959	-5.7425	0.812421	0.500079	-79.7066	0.182924	-31.1633	0.0743394	1.006	1.95	0.334
0.4	-62.1604	287.948	-3.0519	-5.7425	0.812441	0.500059	-79.6859	0.20366	-31.1426	0.0950754	1.043	2.005	0.406
0.5	-61.8592	287.898	-3.102	-5.7425	0.812446	0.500054	-79.6724	0.217157	-31.1291	0.108572	1.075	2.029	0.454
0.75	-61.5528	287.849	-3.1513	-5.7424	0.812445	0.499955	-79.6488	0.240763	-31.1055	0.132178	1.079	2.075	0.544
1	-61.4908	287.841	-3.1585	-5.7425	0.812447	0.500053	-79.6285	0.26105	-31.0852	0.152465	1.063	2.094	0.586
1.25	-61.5565	287.856	-3.1439	-5.7425	0.812447	0.500053	-79.6104	0.279218	-31.067	0.170633	1.046	2.1	0.584
1.5	-61.5705	287.858	-3.1415	-5.7425	0.812445	0.500055	-79.6106	0.278968	-31.0673	0.170383	1.04	2.104	0.586
1.75	-61.3762	287.82	-3.1803	-5.7424	0.812447	0.499953	-79.6388	0.250801	-31.0954	0.142216	1.034	2.147	0.674
2	-61.2042	287.783	-3.2175	-5.7425	0.812416	0.500084	-79.6807	0.208826	-31.1374	0.100241	1.03	2.186	0.758
2.25	-61.1145	287.761	-3.2386	-5.7424	0.812421	0.499979	-79.7118	0.177755	-31.1685	0.0691703	1.027	2.214	0.804
2.5	-61.0485	287.747	-3.2535	-5.7425	0.812415	0.500085	-79.7317	0.157844	-31.1884	0.0492592	1.024	2.232	0.834
3	-60.9549	287.727	-3.2732	-5.7424	0.812419	0.499981	-79.7509	0.138659	-31.2076	0.0300745	1.02	2.253	0.866
4	-60.839	287.704	-3.2959	-5.7425	0.812448	0.500052	-79.7657	0.12389	-31.2224	0.0153055	1.013	2.279	0.898
5	-60.7806	287.692	-3.3077	-5.7425	0.812445	0.500055	-79.7751	0.114489	-31.2318	0.00590419	1.014	2.299	0.912
6	-60.7512	287.686	-3.3139	-5.7424	0.812416	0.499984	-79.781	0.108585	-31.2377	0	1.014	2.304	0.92
Ag(s)	-35.3067		-2.3258	-5.6912	0.761153	0.500047	-48.5433
Ag25 0.25V											Partial charges
Distance (z, Å)	Electronic Energy (eV)	No. of electrons	Net No. electrons	Fermi Level (eV)	Fermi_SHIFT (eV)	Voltage (V)	Free Energy (G, eV)	ΔG (eV)	ΔG[Ag+](eV)	ΔG_depo (eV)	Solvation shell	Bulk	Sum of nearest neighbors
0	-68.9359	289.107	-1.8932	-5.4925	0.812449	0.250051	-79.3343	0	-31.3209	-0.330496	0.791	1.102	-0.264
0.1	-68.9213	289.112	-1.8883	-5.4924	0.812423	0.249977	-79.2926	0.0417214	-31.2792	-0.288774	0.76	1.127	-0.214
0.2	-68.861	289.111	-1.8888	-5.4925	0.812408	0.250092	-79.2352	0.0990304	-31.2219	-0.231465	0.763	1.127	-0.196
0.25	-68.8201	289.11	-1.8904	-5.4925	0.812416	0.250084	-79.2031	0.131182	-31.1898	-0.199313	0.781	1.109	-0.208
0.3	-68.7746	289.108	-1.8924	-5.4925	0.812445	0.250055	-79.1686	0.165681	-31.1553	-0.164815	0.766	1.13	-0.178
0.4	-68.6494	289.098	-1.9021	-5.4924	0.812414	0.249986	-79.0965	0.237742	-31.0832	-0.092754	0.775	1.129	-0.156
0.5	-68.4729	289.079	-1.921	-5.4924	0.812447	0.249953	-79.0238	0.310526	-31.0104	-0.0199698	0.803	1.114	-0.15
0.6	-65.1514	288.488	-2.5123	-5.4924	0.812444	0.249956	-78.95	0.384311	-30.9366	0.0538151	0.996	1.515	0.262
0.7	-64.8415	288.434	-2.5657	-5.4925	0.812418	0.250082	-78.9336	0.400638	-30.9203	0.0701426	1.012	1.558	0.324
0.75	-64.7912	288.426	-2.5736	-5.4925	0.812417	0.250083	-78.9267	0.407623	-30.9133	0.0771277	1.03	1.54	0.324
0.8	-64.7358	288.418	-2.5825	-5.4925	0.81242	0.25008	-78.9202	0.41405	-30.9069	0.0835544	1.015	1.565	0.346
0.9	-64.6461	288.403	-2.5969	-5.4925	0.812416	0.250084	-78.9095	0.424751	-30.8962	0.0942555	1.018	1.582	0.374
1	-64.6198	288.4	-2.6	-5.4925	0.812442	0.250058	-78.9003	0.433963	-30.887	0.103468	1.034	1.569	0.376
1.25	-64.6189	288.403	-2.5974	-5.4925	0.812443	0.250057	-78.8851	0.44919	-30.8717	0.118695	1.024	1.573	0.39
1.5	-64.6173	288.402	-2.5976	-5.4924	0.812442	0.249958	-78.8844	0.449883	-30.8711	0.119387	1.023	1.575	0.396
1.75	-64.4433	288.368	-2.6323	-5.4925	0.812447	0.250053	-78.9012	0.433031	-30.8879	0.102535	1.025	1.606	0.45
2	-64.211	288.32	-2.68	-5.4925	0.812447	0.250053	-78.9309	0.403422	-30.9175	0.0729263	1.023	1.66	0.528
2.25	-64.0647	288.289	-2.7111	-5.4924	0.812418	0.249982	-78.9551	0.379145	-30.9418	0.0486493	1.02	1.691	0.576
2.5	-63.9664	288.268	-2.7318	-5.4924	0.812441	0.249959	-78.9705	0.36379	-30.9571	0.033294	1.017	1.714	0.606
3	-63.8257	288.24	-2.7599	-5.4924	0.812419	0.249981	-78.9842	0.350122	-30.9708	0.0196264	1.02	1.745	0.638
4	-63.6198	288.201	-2.799	-5.4924	0.812416	0.249984	-78.993	0.341288	-30.9796	0.010792	1.013	1.778	0.672
5	-63.4932	288.177	-2.8232	-5.4925	0.812415	0.250085	-78.9997	0.334612	-30.9863	0.0041161	1.014	1.808	0.692
6	-63.4317	288.165	-2.8352	-5.4924	0.812446	0.249954	-79.0038	0.330496	-30.9904	0	1.014	1.824	0.7
Ag(s)	-37.9058		-1.8576	-5.4412	0.761144	0.250056	-48.0133
Ag25 0.00V											Partial charges
Distance (z, Å)	Electronic Energy (eV)	No. of electrons	Net No. electrons	Fermi Level (eV)	Fermi_SHIFT (eV)	Voltage (V)	Free Energy (G, eV)	ΔG (eV)	ΔG[Ag+](eV)	ΔG_depo (eV)	Solvation shell	Bulk	Sum of nearest neighbors
0	-71.523	289.59	-1.4099	-5.2424	0.81242	-2.0259e-05	-78.9142	0	-31.2751	-0.529173	0.731	0.682	-0.402
0.1	-71.5356	289.6	-1.3996	-5.2425	0.81241	9.0186e-05	-78.873	0.0412532	-31.2339	-0.48792	0.701	0.695	-0.358
0.2	-71.4662	289.598	-1.4017	-5.2425	0.812416	8.40957e-05	-78.8146	0.0996039	-31.1755	-0.429569	0.701	0.701	-0.34
0.25	-71.4097	289.594	-1.4061	-5.2425	0.812448	5.1585e-05	-78.7812	0.133095	-31.142	-0.396078	0.721	0.69	-0.35
0.3	-71.3634	289.592	-1.4082	-5.2425	0.812447	5.31097e-05	-78.7459	0.168348	-31.1068	-0.360825	0.704	0.709	-0.32
0.4	-71.1966	289.574	-1.4257	-5.2424	0.812417	-1.69834e-05	-78.6707	0.24351	-31.0316	-0.285663	0.71	0.712	-0.302
0.5	-70.9368	289.539	-1.4605	-5.2425	0.812416	8.44305e-05	-78.5935	0.320751	-30.9544	-0.208422	0.745	0.714	-0.294
0.6	-70.6225	289.494	-1.5062	-5.2424	0.812452	-5.19278e-05	-78.5186	0.395625	-30.8795	-0.133548	0.754	0.751	-0.25
0.7	-70.2337	289.433	-1.5671	-5.2425	0.812418	8.22831e-05	-78.4492	0.465036	-30.8101	-0.0641375	0.789	0.778	-0.212
0.75	-70.0132	289.397	-1.6031	-5.2424	0.812417	-1.7169e-05	-78.4173	0.496929	-30.7782	-0.0322445	0.828	0.78	-0.198
0.8	-69.634	289.33	-1.67	-5.2424	0.812415	-1.46126e-05	-78.3888	0.525402	-30.7497	-0.00377153	0.857	0.815	-0.142
0.9	-68.571	289.133	-1.8669	-5.2425	0.812423	7.71248e-05	-78.3582	0.556051	-30.7191	0.0268777	0.947	0.917	0.056
1	-68.3484	289.093	-1.9067	-5.2424	0.812428	-2.84013e-05	-78.344	0.570208	-30.7049	0.0410352	0.976	0.93	0.096
1.25	-68.1514	289.059	-1.9407	-5.2425	0.812445	5.53632e-05	-78.3256	0.588699	-30.6864	0.0595256	0.986	0.95	0.158
1.5	-68.0813	289.047	-1.9534	-5.2425	0.81244	6.01288e-05	-78.322	0.592294	-30.6828	0.0631212	0.995	0.961	0.178
1.75	-67.9975	289.029	-1.9709	-5.2424	0.812448	-4.78276e-05	-78.3298	0.584463	-30.6907	0.0552899	1	0.97	0.204
2	-67.8721	289.002	-1.9982	-5.2424	0.812414	-1.37561e-05	-78.3474	0.566813	-30.7083	0.03764	1.005	0.988	0.25
2.25	-67.7841	288.982	-2.0181	-5.2425	0.812445	5.45164e-05	-78.364	0.550241	-30.7249	0.0210682	1.008	1.013	0.286
2.5	-67.7299	288.97	-2.0304	-5.2425	0.812418	8.15881e-05	-78.3743	0.539995	-30.7351	0.0108221	1.009	1.021	0.308
3	-67.6583	288.954	-2.0455	-5.2424	0.812419	-1.91766e-05	-78.3816	0.532664	-30.7425	0.00349096	1.01	1.036	0.326
4	-67.5592	288.935	-2.0645	-5.2424	0.812446	-4.62044e-05	-78.3821	0.532123	-30.743	0.00294959	1.011	1.051	0.346
5	-67.4947	288.923	-2.077	-5.2425	0.81245	5.0277e-05	-78.3834	0.530886	-30.7442	0.00171286	1.014	1.066	0.356
6	-67.4615	288.916	-2.0837	-5.2424	0.812449	-4.90827e-05	-78.3851	0.529173	-30.7459	0	1.014	1.066	0.36
Ag(s)	-41.9398		-1.0979	-5.1911	0.761128	-2.83409e-05	-47.6391

## Sheet: Ag24 corrosion
Ag24 1.00V			*Total charge of the cell is the negative of the net number of electrons.						Partial charges
Distance (z, Å)	Electronic Energy (eV)	No. of electrons	Net No. electrons	Fermi Level (eV)	Fermi_SHIFT (eV)	Voltage (V)	Free Energy (G, eV)	ΔG (eV)	Solvation shell	Bulk	Horizontal Drift (Å)		*Sum of solvation shell charge and bullk charge is equal to total cell charge.
0	-57.7602	276.509	-3.4915	-6.2107	0.780731	0.999969	-79.4449	0	0.503	2.988	0
0.1	-57.5431	276.479	-3.5212	-6.2107	0.780708	0.999992	-79.4122	0.032687	0.553	2.969	1e-05
0.2	-57.3239	276.448	-3.5517	-6.2107	0.780703	0.999997	-79.3825	0.0623936	0.613	2.94	0.00682
0.3	-57.1511	276.425	-3.5747	-6.2108	0.7807	1.0001	-79.3529	0.0920018	0.651	2.923	0.02279
0.4	-57.0001	276.406	-3.5937	-6.2108	0.780702	1.0001	-79.3199	0.124982	0.683	2.908	0.03882
0.5	-56.8527	276.388	-3.6116	-6.2108	0.780739	1.00006	-79.2837	0.161194	0.714	2.9	0.06629
0.6	-56.7156	276.372	-3.6277	-6.2107	0.780706	0.999994	-79.2462	0.198662	0.74	2.891	0.09837
0.7	-56.5745	276.356	-3.6442	-6.2108	0.780728	1.00007	-79.2079	0.236976	0.764	2.88	0.13857
0.8	-56.4523	276.342	-3.6578	-6.2107	0.780695	1	-79.1698	0.275062	0.785	2.876	0.19819
0.9	-56.3357	276.329	-3.6707	-6.2107	0.780701	0.999999	-79.1333	0.311513	0.803	2.868	0.25815
1	-56.2275	276.318	-3.6824	-6.2107	0.780711	0.999989	-79.0978	0.347056	0.824	2.859	0.33736
1.1	-56.1245	276.306	-3.6936	-6.2107	0.780726	0.999974	-79.0644	0.380483	0.841	2.855	0.41977
1.2	-56.0241	276.295	-3.7046	-6.2107	0.780696	1	-79.0322	0.412631	0.856	2.848	0.48388
1.3	-55.9354	276.286	-3.7137	-6.2107	0.780703	0.999997	-79.0001	0.444771	0.868	2.846	0.54799
1.4	-55.4499	276.232	-3.7677	-6.2108	0.780701	1.0001	-78.8503	0.594557	0.961	2.805	-0.97843
1.5	-55.3966	276.221	-3.7785	-6.2107	0.780721	0.999979	-78.8638	0.5811	0.987	2.791	-1.35508
1.6	-55.3314	276.205	-3.7945	-6.2108	0.780705	1.0001	-78.8983	0.546596	1.003	2.795	-1.66476
1.7	-55.1917	276.177	-3.8226	-6.2107	0.780731	0.999969	-78.9327	0.512119	1.015	2.808	-1.81912
1.8	-54.9527	276.135	-3.865	-6.2108	0.780726	1.00007	-78.9575	0.487372	1.031	2.834	-1.92857
1.9	-54.6829	276.089	-3.9112	-6.2108	0.780708	1.00009	-78.9746	0.470293	1.051	2.86	-2.01207
2	-54.3357	276.031	-3.9691	-6.2107	0.780705	0.999995	-78.9866	0.458301	1.072	2.899	-2.07588
2.103	-53.9405	275.965	-4.0348	-6.2107	0.7807	1	-78.9994	0.44542	1.094	2.94	-2.14721
2.2	-53.6085	275.909	-4.0906	-6.2107	0.780701	0.999999	-79.014	0.430838	1.107	2.982	-2.17716
2.3	-53.3057	275.858	-4.142	-6.2106	0.780692	0.999908	-79.03	0.414875	1.118	3.026	-2.2032
2.4	-53.0908	275.821	-4.1792	-6.2107	0.780736	0.999964	-79.0465	0.398332	1.123	3.059	-2.22005
2.5	-52.9505	275.796	-4.204	-6.2107	0.780703	0.999997	-79.0602	0.384613	1.121	3.083	-2.22887
2.6	-52.8652	275.781	-4.2194	-6.2106	0.780697	0.999903	-79.0702	0.374672	1.116	3.103	-2.2234
2.7	-52.8047	275.77	-4.2302	-6.2107	0.780704	0.999996	-79.0772	0.367654	1.107	3.122	-2.22446
2.8	-52.7691	275.764	-4.2364	-6.2107	0.780729	0.999971	-79.0801	0.364717	1.098	3.138	-2.21679
2.9	-52.7352	275.758	-4.2419	-6.2107	0.780698	1	-79.0804	0.364499	1.088	3.152	-2.19743
3	-52.6933	275.752	-4.2482	-6.2107	0.780703	0.999997	-79.0776	0.367247	1.076	3.17	-2.17427
3.25	-52.4845	275.719	-4.2807	-6.2107	0.780701	0.999999	-79.0706	0.374249	1.056	3.227	-2.04189
3.5	-52.2134	275.676	-4.3242	-6.2106	0.780699	0.999901	-79.0692	0.375632	1.05	3.275	-1.91903
3.75	-52.5991	275.737	-4.263	-6.2107	0.780705	0.999995	-79.0753	0.369562	1.018	3.247	-1.63981
4	-52.4946	275.711	-4.2888	-6.2108	0.780703	1.0001	-79.1315	0.313347	1.016	3.271	-1.91851
4.25	-52.4189	275.692	-4.3076	-6.2107	0.780706	0.999994	-79.1721	0.272776	1.012	3.295	-1.95054
4.5	-52.3457	275.676	-4.3237	-6.2107	0.780695	1	-79.1989	0.245928	1.009	3.315	-1.95068
4.75	-52.2882	275.664	-4.336	-6.2108	0.780736	1.00006	-79.2183	0.226607	1.007	3.33	-1.95423
5	-52.2421	275.654	-4.3455	-6.2108	0.780735	1.00006	-79.2311	0.213747	1.006	3.338	-1.95516
5.25	-52.2047	275.647	-4.3532	-6.2107	0.780735	0.999965	-79.2411	0.20372	1.005	3.348	-1.95487
5.5	-52.1736	275.641	-4.3594	-6.2107	0.780735	0.999965	-79.2485	0.196371	1.006	3.354	-1.95486
6	-52.126	275.631	-4.3691	-6.2107	0.780697	1	-79.2612	0.183688	1.005	3.367	-1.95434
1.4	-55.843	276.276	-3.7235	-6.2107	0.780724	0.999976	-78.9685	0.476346	0.878	2.846	0.62418	** Grey background denotes vertical displacement pathway
1.5	-55.7324	276.264	-3.7361	-6.2108	0.780723	1.00008	-78.9366	0.508293	0.891	2.844	0.7043
1.6	-55.6032	276.248	-3.7515	-6.2107	0.780701	0.999999	-78.9026	0.542257	0.905	2.847	0.75498
1.7	-55.4527	276.23	-3.7701	-6.2107	0.7807	1	-78.8677	0.577195	0.916	2.853	0.82321
1.8	-55.2769	276.207	-3.7926	-6.2107	0.780732	0.999968	-78.8316	0.613308	0.934	2.862	0.85242
1.9	-55.0508	276.177	-3.8233	-6.2107	0.780699	1	-78.7962	0.648695	0.953	2.869	0.85564
2	-54.7887	276.14	-3.8601	-6.2107	0.780709	0.999991	-78.7626	0.682256	0.973	2.884	0.82922
2.1	-54.4138	276.084	-3.916	-6.2107	0.780724	0.999976	-78.7349	0.709943	0.999	2.915	0.72317
2.2	-53.9166	276.006	-3.9937	-6.2107	0.780734	0.999966	-78.7203	0.724611	1.034	2.947	0.47813
Ag24 0.75V									Partial charges
Distance (z, Å)	Electronic Energy (eV)	No. of electrons	Net No. electrons	Fermi Level (eV)	Fermi_SHIFT (eV)	Voltage (V)	Free Energy (G, eV)	ΔG (eV)	Solvation shell	Bulk	Horizontal Drift (Å)
0	-60.6224	276.979	-3.0209	-5.9607	0.780698	0.750002	-78.6291	0	0.442	2.577	0
0.1	-60.5167	276.967	-3.0333	-5.9607	0.780707	0.749993	-78.5972	0.0318384	0.47	2.561	0.00305
0.2	-60.1865	276.919	-3.0813	-5.9608	0.780731	0.750069	-78.5535	0.0755838	0.535	2.545	0.00779
0.3	-59.876	276.873	-3.1268	-5.9608	0.78073	0.75007	-78.5142	0.114849	0.597	2.531	0.01978
0.4	-59.6788	276.847	-3.1534	-5.9608	0.780707	0.750093	-78.4756	0.153501	0.638	2.517	0.0374
0.5	-59.4969	276.823	-3.1771	-5.9607	0.780707	0.749993	-78.4347	0.194405	0.67	2.51	0.06444
0.6	-59.3236	276.801	-3.1993	-5.9607	0.780709	0.749991	-78.3937	0.235383	0.703	2.496	0.09809
0.7	-59.1555	276.779	-3.2205	-5.9608	0.780709	0.750091	-78.3523	0.276782	0.722	2.496	0.13877
0.8	-59.0055	276.761	-3.2388	-5.9607	0.780732	0.749968	-78.311	0.318033	0.747	2.493	0.19482
0.9	-58.8703	276.745	-3.2548	-5.9607	0.780698	0.750002	-78.2712	0.357905	0.768	2.486	0.26409
1	-58.7688	276.734	-3.2656	-5.9608	0.780724	0.750076	-78.2344	0.394669	0.785	2.478	0.33872
1.1	-58.6932	276.728	-3.2722	-5.9608	0.780721	0.750079	-78.1981	0.430946	0.8	2.476	0.42158
1.2	-58.63	276.723	-3.277	-5.9607	0.780711	0.749989	-78.1632	0.465914	0.815	2.464	0.49242
1.3	-58.5722	276.719	-3.281	-5.9607	0.780727	0.749973	-78.1293	0.499805	0.826	2.452	0.56499
1.4	-58.0777	276.663	-3.3369	-5.9608	0.780725	0.750075	-77.9683	0.660825	0.913	2.422	-0.98673
1.5	-58.6908	276.763	-3.2372	-5.9607	0.780724	0.749976	-77.9868	0.642277	0.909	2.328	-1.42818
1.6	-58.9179	276.795	-3.2048	-5.9608	0.780707	0.750093	-78.0211	0.607978	0.92	2.288	-1.70088
1.7	-59.0674	276.815	-3.1851	-5.9608	0.780704	0.750096	-78.0532	0.575909	0.906	2.281	-1.85945
1.8	-59.1659	276.828	-3.1716	-5.9608	0.780703	0.750097	-78.0711	0.557935	0.897	2.275	-1.98112
1.9	-57.9241	276.621	-3.3789	-5.9608	0.780707	0.750093	-78.0651	0.564005	0.983	2.397	-2.03863
2	-57.5052	276.551	-3.4492	-5.9607	0.780731	0.749969	-78.0648	0.56427	1.016	2.432	-2.09798
2.103	-57.2315	276.505	-3.495	-5.9607	0.780701	0.749999	-78.0642	0.564916	1.046	2.45	-2.17517
2.2	-56.9632	276.46	-3.5403	-5.9608	0.780727	0.750073	-78.0662	0.56284	1.07	2.473	-2.19897
2.3	-56.7494	276.423	-3.5767	-5.9607	0.780727	0.749973	-78.0691	0.560014	1.081	2.497	-2.23007
2.4	-56.5466	276.388	-3.6116	-5.9608	0.780722	0.750078	-78.0746	0.554499	1.09	2.523	-2.25225
2.5	-56.428	276.368	-3.6324	-5.9607	0.780728	0.749972	-78.0796	0.549452	1.092	2.54	-2.27266
2.6	-56.3029	276.346	-3.6542	-5.9607	0.780727	0.749973	-78.0845	0.544554	1.091	2.566	-2.28054
2.7	-56.2212	276.332	-3.6684	-5.9607	0.780698	0.750002	-78.0874	0.541662	1.087	2.58	-2.27603
2.8	-56.114	276.314	-3.6864	-5.9607	0.780738	0.749962	-78.0876	0.54152	1.078	2.608	-2.22446
2.9	-56.0811	276.308	-3.6916	-5.9607	0.780699	0.750001	-78.0856	0.543458	1.069	2.624	-2.19775
3	-56.0549	276.305	-3.6954	-5.9607	0.780707	0.749993	-78.0821	0.546981	1.062	2.633	-2.17188
3.25	-55.8959	276.281	-3.7195	-5.9608	0.780707	0.750093	-78.0671	0.562029	1.041	2.678	-2.04584
3.5	-56.376	276.366	-3.6343	-5.9608	0.780703	0.750097	-78.0394	0.589729	1.024	2.614	-1.96997
3.75	-56.0549	276.306	-3.6941	-5.9607	0.78071	0.74999	-78.0743	0.554741	1.017	2.68	-1.80526
4	-55.8634	276.265	-3.7345	-5.9607	0.780725	0.749975	-78.1236	0.505445	1.012	2.724	-1.92462
4.25	-55.7604	276.242	-3.7576	-5.9607	0.780693	0.750007	-78.1584	0.470711	1.012	2.748	-1.95671
4.5	-55.666	276.223	-3.7772	-5.9607	0.780694	0.750006	-78.1807	0.448332	1.009	2.77	-1.95765
4.75	-55.5921	276.208	-3.792	-5.9607	0.780698	0.750002	-78.1951	0.433985	1.007	2.783	-1.96042
5	-55.5297	276.196	-3.8042	-5.9607	0.780734	0.749966	-78.2054	0.423674	1.006	2.797	-1.96069
5.25	-55.4773	276.186	-3.8142	-5.9607	0.780734	0.749966	-78.2126	0.416447	1.005	2.806	-1.96074
5.5	-55.4328	276.177	-3.8227	-5.9607	0.780699	0.750001	-78.2188	0.410277	1.004	2.817	-1.9607
6	-55.3639	276.164	-3.8358	-5.9606	0.780697	0.749903	-78.2276	0.401471	1.006	2.834	-1.96039
1.4	-58.5289	276.717	-3.2825	-5.9607	0.780711	0.749989	-78.0949	0.534206	0.835	2.45	0.64747
1.5	-58.4707	276.714	-3.2864	-5.9608	0.78071	0.75009	-78.0603	0.568771	0.844	2.443	0.72653
1.6	-58.4079	276.709	-3.2908	-5.9608	0.780712	0.750088	-78.0237	0.605377	0.854	2.438	0.80368
1.7	-58.2848	276.695	-3.3049	-5.9607	0.780724	0.749976	-77.9843	0.644762	0.864	2.439	0.85965
1.8	-58.1232	276.675	-3.3251	-5.9608	0.78071	0.75009	-77.9435	0.685595	0.877	2.445	0.90299
1.9	-57.873	276.64	-3.36	-5.9607	0.780727	0.749973	-77.9009	0.728147	0.903	2.456	0.89936
2	-57.5791	276.598	-3.4024	-5.9608	0.7807	0.7501	-77.8601	0.768935	0.929	2.473	0.85882
2.1	-57.2913	276.556	-3.4444	-5.9609	0.780697	0.750203	-77.823	0.806045	0.962	2.482	0.7489
2.2	-57.0326	276.517	-3.483	-5.9608	0.780735	0.750065	-77.794	0.835032	0.994	2.488	0.57383
Ag24 0.50V									Partial charges
Distance (z, Å)	Electronic Energy (eV)	No. of electrons	Net No. electrons	Fermi Level (eV)	Fermi_SHIFT (eV)	Voltage (V)	Free Energy (G, eV)	ΔG (eV)	Solvation shell	Bulk	Horizontal Drift (Å)
0	-63.3249	277.442	-2.5585	-5.7108	0.780736	0.500064	-77.936	0	0.371	2.185	0
0.1	-63.2315	277.431	-2.5691	-5.7108	0.780731	0.500069	-77.9031	0.0329067	0.399	2.171	0.00605
0.2	-63.0923	277.415	-2.5853	-5.7107	0.780708	0.499992	-77.8562	0.0798386	0.426	2.161	0.01228
0.3	-62.695	277.356	-2.6445	-5.7106	0.780699	0.499901	-77.7967	0.13935	0.508	2.137	0.01869
0.4	-62.401	277.312	-2.6875	-5.7107	0.780735	0.499965	-77.7485	0.187503	0.572	2.115	0.03918
0.5	-62.2299	277.291	-2.7093	-5.7108	0.78073	0.50007	-77.7021	0.233863	0.611	2.101	0.06617
0.6	-62.0844	277.273	-2.7266	-5.7108	0.780726	0.500074	-77.6555	0.280531	0.645	2.083	0.09611
0.7	-61.9614	277.26	-2.74	-5.7107	0.780727	0.499973	-77.6087	0.327283	0.665	2.073	0.14718
0.8	-61.8424	277.247	-2.7529	-5.7108	0.780705	0.500095	-77.5636	0.372376	0.689	2.061	0.20808
0.9	-61.7374	277.236	-2.7637	-5.7107	0.780714	0.499986	-77.5201	0.415919	0.708	2.06	0.28005
1	-61.6315	277.225	-2.7751	-5.7106	0.780716	0.499884	-77.479	0.457008	0.724	2.053	0.35671
1.1	-61.548	277.217	-2.7832	-5.7107	0.780731	0.499969	-77.4421	0.493958	0.739	2.045	0.44936
1.2	-61.4642	277.208	-2.7917	-5.7106	0.780714	0.499886	-77.4064	0.52956	0.749	2.045	0.53178
1.3	-61.3989	277.203	-2.7972	-5.7107	0.780707	0.499993	-77.3729	0.563142	0.755	2.044	0.61407
1.4	-61.538	277.252	-2.7485	-5.7102	0.7807	0.4995	-77.2325	0.703524	0.8	1.948	-1.14034
1.5	-61.419	277.228	-2.7723	-5.7108	0.780728	0.500072	-77.2511	0.684927	0.831	1.942	-1.43208
1.6	-61.4155	277.221	-2.7788	-5.7108	0.780726	0.500074	-77.2847	0.65131	0.85	1.931	-1.70221
1.7	-61.4735	277.226	-2.7744	-5.7108	0.780703	0.500097	-77.3175	0.618495	0.848	1.929	-1.86908
1.8	-61.5517	277.236	-2.764	-5.7107	0.780702	0.499998	-77.3361	0.599893	0.843	1.922	-1.99127
1.9	-61.5973	277.243	-2.7565	-5.7108	0.780734	0.500066	-77.3392	0.59685	0.842	1.914	-2.08766
2	-61.6145	277.249	-2.7513	-5.7108	0.780706	0.500094	-77.3266	0.609424	0.843	1.909	-2.18079
2.103	-61.5722	277.246	-2.7539	-5.7116	0.7807	0.5009	-77.3014	0.634602	0.848	1.908	-2.27383
2.2	-60.044	276.989	-3.0113	-5.7108	0.780723	0.500077	-77.2409	0.695089	0.99	2.023	-2.27603
2.3	-59.3567	276.87	-3.1295	-5.7108	0.780731	0.500069	-77.2287	0.707325	1.037	2.093	-2.28624
2.4	-58.9551	276.801	-3.1992	-5.7108	0.780705	0.500095	-77.2251	0.710885	1.062	2.142	-2.30032
2.5	-58.7091	276.758	-3.2424	-5.7108	0.78071	0.50009	-77.2258	0.710222	1.071	2.173	-2.30481
2.6	-58.5558	276.731	-3.2694	-5.7108	0.780706	0.500094	-77.2266	0.709361	1.077	2.197	-2.3036
2.7	-58.4729	276.716	-3.284	-5.7107	0.780697	0.500003	-77.2268	0.709165	1.071	2.213	-2.29343
2.8	-58.419	276.707	-3.2931	-5.7107	0.780732	0.499968	-77.2249	0.711091	1.065	2.23	-2.23596
2.9	-58.3781	276.7	-3.2998	-5.7108	0.780726	0.500074	-77.2226	0.713444	1.057	2.245	-2.20003
3	-58.3658	276.699	-3.3011	-5.7108	0.7807	0.5001	-77.2177	0.7183	1.03	2.273	-2.17453
3.25	-58.3442	276.698	-3.3019	-5.7107	0.780729	0.499971	-77.2004	0.735605	1.018	2.241	-2.05826
3.5	-58.5635	276.739	-3.2606	-5.7106	0.780693	0.499907	-77.1835	0.752505	1.013	2.289	-1.97596
3.75	-58.4146	276.709	-3.2912	-5.7107	0.780703	0.499997	-77.2096	0.726383	1.014	2.274	-1.92108
4	-58.2933	276.68	-3.32	-5.7108	0.780734	0.500066	-77.2532	0.682822	1.008	2.32	-1.92912
4.25	-58.2566	276.668	-3.3318	-5.7107	0.780696	0.500004	-77.2835	0.652481	1.008	2.331	-1.96128
4.5	-58.2229	276.659	-3.3411	-5.7108	0.780735	0.500065	-77.3032	0.632803	1.006	2.341	-1.96356
4.75	-58.1949	276.652	-3.3481	-5.7108	0.780734	0.500066	-77.3152	0.620802	1.012	2.306	-1.96472
5	-58.171	276.646	-3.3536	-5.7107	0.780733	0.499967	-77.3224	0.613597	1.005	2.353	-1.96493
5.25	-58.1492	276.642	-3.3584	-5.7108	0.780733	0.500067	-77.3283	0.607703	1.005	2.357	-1.96515
5.5	-58.1312	276.638	-3.3623	-5.7108	0.780733	0.500067	-77.3326	0.603434	1.006	2.35	-1.96488
6	-58.1021	276.632	-3.3685	-5.7108	0.780735	0.500065	-77.339	0.597042	1.006	2.369	-1.96488
1.4	-61.3265	277.196	-2.804	-5.7108	0.780728	0.500072	-77.3395	0.596464	0.763	2.042	0.70309
1.5	-61.2674	277.192	-2.8083	-5.7106	0.780717	0.499883	-77.3044	0.631569	0.769	2.043	0.79907
1.6	-61.2126	277.188	-2.8115	-5.7106	0.780718	0.499882	-77.268	0.668028	0.773	2.038	0.89377
1.7	-61.1528	277.185	-2.815	-5.7107	0.780719	0.499981	-77.2284	0.707629	0.78	2.035	0.97302
1.8	-61.0909	277.182	-2.8182	-5.7107	0.780733	0.499967	-77.1848	0.751243	0.785	2.033	1.05026
1.9	-61.0094	277.176	-2.824	-5.7108	0.780712	0.500088	-77.1367	0.799338	0.792	2.035	1.11254
2	-60.8765	277.162	-2.8381	-5.7108	0.780724	0.500076	-77.0843	0.851731	0.808	2.033	1.13875
2.1	-60.5517	277.115	-2.8853	-5.7107	0.780695	0.500005	-77.0288	0.907193	0.851	2.037	1.05709
2.2	-59.7802	276.989	-3.0113	-5.7108	0.780701	0.500099	-76.9772	0.958842	0.917	2.095	0.8339
Ag24 0.25V									Partial charges
Distance (z, Å)	Electronic Energy (eV)	No. of electrons	Net No. electrons	Fermi Level (eV)	Fermi_SHIFT (eV)	Voltage (V)	Free Energy (G, eV)	ΔG (eV)	Solvation shell	Bulk	Horizontal Drift (Å)
0	-65.6552	277.858	-2.1416	-5.4608	0.780729	0.250071	-77.35	0	0.31	1.828	0
0.1	-65.5807	277.851	-2.1491	-5.4608	0.780701	0.250099	-77.3165	0.03356	0.334	1.814	0.00622
0.2	-65.4745	277.841	-2.1594	-5.4608	0.780733	0.250067	-77.2666	0.083428	0.356	1.801	0.01537
0.3	-65.334	277.826	-2.1739	-5.4609	0.780702	0.250198	-77.2054	0.144613	0.383	1.789	0.02811
0.4	-64.8856	277.757	-2.2425	-5.4608	0.7807	0.2501	-77.1314	0.218596	0.479	1.761	0.03999
0.5	-64.5258	277.702	-2.2975	-5.4608	0.780733	0.250067	-77.0719	0.278085	0.549	1.747	0.0686
0.6	-64.2978	277.671	-2.3294	-5.4608	0.780734	0.250066	-77.0182	0.331859	0.59	1.739	0.09744
0.7	-64.1112	277.646	-2.354	-5.4608	0.780731	0.250069	-76.9659	0.384099	0.617	1.733	0.15077
0.8	-63.9579	277.627	-2.373	-5.4607	0.780731	0.249969	-76.9161	0.433898	0.643	1.73	0.21403
0.9	-63.8395	277.614	-2.3862	-5.4606	0.780725	0.249875	-76.8696	0.480446	0.663	1.727	0.28941
1	-63.7668	277.608	-2.3917	-5.4607	0.780734	0.249966	-76.8271	0.522888	0.677	1.713	0.36865
1.1	-63.7384	277.61	-2.3897	-5.4608	0.780734	0.250066	-76.7881	0.561922	0.693	1.697	0.45692
1.2	-63.7432	277.618	-2.3821	-5.4608	0.780731	0.250069	-76.7514	0.598629	0.701	1.683	0.55112
1.3	-63.7582	277.627	-2.3731	-5.4608	0.78071	0.25009	-76.7172	0.632806	0.712	1.66	0.63745
1.4	-64.5228	277.788	-2.2122	-5.4607	0.78071	0.24999	-76.603	0.747026	0.746	1.466	-1.11477
1.5	-64.4375	277.77	-2.2304	-5.4608	0.780729	0.250071	-76.6172	0.732794	0.781	1.447	-1.39665
1.6	-64.4122	277.759	-2.2409	-5.4608	0.78073	0.25007	-76.6493	0.700719	0.801	1.438	-1.70231
1.7	-64.4808	277.765	-2.2347	-5.4608	0.780734	0.250066	-76.684	0.665994	0.801	1.434	-1.87794
1.8	-64.5767	277.779	-2.2212	-5.4607	0.780732	0.249968	-76.706	0.644003	0.798	1.421	-2.00622
1.9	-64.6685	277.795	-2.2055	-5.4608	0.780727	0.250073	-76.7123	0.6377	0.792	1.416	-2.10557
2	-64.7479	277.811	-2.1891	-5.4608	0.780705	0.250095	-76.7021	0.647905	0.787	1.403	-2.20086
2.103	-64.7925	277.824	-2.1763	-5.4608	0.780733	0.250067	-76.6768	0.673194	0.787	1.39	-2.29881
2.2	-64.7847	277.828	-2.1716	-5.4611	0.780699	0.250401	-76.644	0.706002	0.789	1.381	-2.38004
2.3	-64.7551	277.831	-2.1692	-5.4607	0.780731	0.249969	-76.6004	0.749586	0.792	1.377	-2.47655
2.4	-64.6385	277.818	-2.1818	-5.4613	0.780695	0.250605	-76.554	0.796039	0.807	1.373	-2.57293
2.5	-62.3034	277.403	-2.5971	-5.4607	0.780703	0.249997	-76.4854	0.864637	0.999	1.597	-2.44893
2.6	-61.8323	277.319	-2.6813	-5.4607	0.780727	0.249973	-76.4741	0.875958	1.033	1.648	-2.43302
2.7	-61.5432	277.267	-2.7329	-5.4607	0.780732	0.249968	-76.4668	0.883261	1.038	1.693	-2.35921
2.8	-61.4068	277.243	-2.7568	-5.4608	0.7807	0.2501	-76.4612	0.888843	1.039	1.721	-2.30687
2.9	-61.3558	277.235	-2.7652	-5.4607	0.78073	0.24997	-76.4557	0.894322	1.034	1.731	-2.25456
3	-61.3129	277.228	-2.7721	-5.4607	0.780724	0.249976	-76.4505	0.899542	1.013	1.741	-2.19756
3.25	-61.3968	277.246	-2.7542	-5.4608	0.78073	0.25007	-76.4369	0.913111	1.007	1.716	-2.08265
3.5	-61.5588	277.276	-2.7236	-5.4607	0.780734	0.249966	-76.4316	0.918437	1.006	1.749	-1.98786
3.75	-61.4667	277.256	-2.7436	-5.4607	0.780725	0.249975	-76.4487	0.901347	1.007	1.736	-1.95503
4	-61.2687	277.214	-2.7857	-5.4607	0.780702	0.249998	-76.4806	0.869459	1.006	1.797	-1.93528
4.25	-61.187	277.195	-2.8054	-5.4607	0.780734	0.249966	-76.5065	0.843532	1.006	1.817	-1.96694
4.5	-61.1212	277.18	-2.8203	-5.4607	0.780734	0.249966	-76.522	0.828048	1.004	1.829	-1.96947
4.75	-61.0653	277.168	-2.8322	-5.4608	0.780733	0.250067	-76.5314	0.818669	1.007	1.777	-1.96987
5	-61.0148	277.158	-2.8425	-5.4608	0.780732	0.250068	-76.5371	0.812913	1.004	1.845	-1.97013
5.25	-60.97	277.149	-2.8513	-5.4607	0.780732	0.249968	-76.5401	0.80993	1.003	1.857	-1.97011
5.5	-60.9282	277.141	-2.8594	-5.4608	0.780733	0.250067	-76.5429	0.807174	1.005	1.838	-1.96993
6	-60.855	277.126	-2.8736	-5.4608	0.780709	0.250091	-76.5471	0.802904	1.004	1.873	-1.96852
1.4	-63.7767	277.636	-2.3636	-5.4608	0.780707	0.250093	-76.6839	0.666173	0.716	1.644	0.73202
1.5	-63.7922	277.645	-2.3546	-5.4607	0.78073	0.24997	-76.65	0.700061	0.722	1.638	0.82844
1.6	-63.8046	277.654	-2.3459	-5.4607	0.780729	0.249971	-76.6149	0.735131	0.728	1.619	0.93231
1.7	-63.8259	277.665	-2.335	-5.4608	0.780735	0.250065	-76.5768	0.77318	0.72	1.616	1.03949
1.8	-63.8452	277.676	-2.3238	-5.4608	0.780725	0.250075	-76.535	0.815055	0.715	1.61	1.14806
1.9	-63.8827	277.692	-2.3084	-5.4607	0.780716	0.249984	-76.4881	0.861878	0.706	1.605	1.26262
2	-65.1566	277.903	-2.0968	-5.4608	0.780711	0.250089	-76.6068	0.74325	0.558	1.539	2.2133
2.1	-63.677	277.674	-2.3256	-5.4608	0.780709	0.250091	-76.3766	0.973434	0.724	1.599	1.3118
2.2	-63.3858	277.632	-2.3676	-5.4607	0.780733	0.249967	-76.3145	1.0355	0.77	1.596	1.20968
Ag24 0.00V									Partial charges
Distance (z, Å)	Electronic Energy (eV)	No. of electrons	Net No. electrons	Fermi Level (eV)	Fermi_SHIFT (eV)	Voltage (V)	Free Energy (G, eV)	ΔG (eV)	Solvation shell	Bulk	Horizontal Drift (Å)
0	-67.8935	278.279	-1.721	-5.2108	0.780727	7.25306e-05	-76.8613	0	0.251	1.473	0
0.1	-67.8955	278.286	-1.714	-5.2108	0.780706	9.35095e-05	-76.8268	0.0345183	0.268	1.447	0.00729
0.2	-67.8965	278.296	-1.7042	-5.2108	0.780727	7.27845e-05	-76.7768	0.0845345	0.28	1.423	0.02158
0.3	-67.8762	278.304	-1.6961	-5.2108	0.780703	9.6782e-05	-76.7143	0.147025	0.299	1.394	0.0364
0.4	-67.8201	278.307	-1.6934	-5.2108	0.780726	7.37288e-05	-76.6441	0.217183	0.324	1.369	0.05483
0.5	-67.6753	278.293	-1.7066	-5.2108	0.780728	7.16139e-05	-76.568	0.293253	0.381	1.331	0.08013
0.6	-67.2088	278.217	-1.783	-5.2107	0.780708	-7.83874e-06	-76.4994	0.361862	0.508	1.278	0.11634
0.7	-67.1171	278.21	-1.7901	-5.2107	0.780706	-6.43039e-06	-76.4447	0.416552	0.54	1.252	0.17302
0.8	-67.0373	278.204	-1.7957	-5.2108	0.780731	6.88389e-05	-76.3943	0.466955	0.566	1.229	0.2357
0.9	-66.972	278.201	-1.7994	-5.2108	0.780704	9.61434e-05	-76.3483	0.512979	0.593	1.209	0.31444
1	-66.9176	278.198	-1.8018	-5.2108	0.78073	6.99946e-05	-76.3064	0.554919	0.618	1.185	0.39379
1.1	-66.8987	278.202	-1.7981	-5.2108	0.780727	7.30823e-05	-76.2682	0.593045	0.633	1.162	0.47582
1.2	-66.8865	278.206	-1.7938	-5.2107	0.780704	-4.13402e-06	-76.2335	0.62782	0.646	1.147	0.56601
1.3	-66.9111	278.217	-1.7828	-5.2107	0.780733	-3.30164e-05	-76.2008	0.660526	0.656	1.131	0.66149
1.4	-67.3831	278.324	-1.6763	-5.2108	0.780733	6.71633e-05	-76.118	0.743339	0.704	0.975	-1.09867
1.5	-67.429	278.33	-1.67	-5.2108	0.780736	6.36427e-05	-76.131	0.730295	0.725	0.946	-1.37152
1.6	-67.5421	278.346	-1.6545	-5.2107	0.780701	-1.01117e-06	-76.1632	0.698056	0.736	0.913	-1.70243
1.7	-67.694	278.367	-1.6328	-5.2108	0.780731	6.86403e-05	-76.2022	0.65908	0.736	0.897	-1.89568
1.8	-67.7946	278.381	-1.6186	-5.2108	0.780732	6.83116e-05	-76.2288	0.632465	0.734	0.885	-2.02614
1.9	-67.8811	278.396	-1.604	-5.2108	0.780734	6.63166e-05	-76.2392	0.622073	0.725	0.881	-2.13102
2	-67.9269	278.406	-1.5941	-5.2107	0.780698	1.83872e-06	-76.2333	0.627995	0.721	0.873	-2.22847
2.103	-67.954	278.415	-1.5848	-5.2108	0.780732	6.78578e-05	-76.2121	0.649181	0.72	0.861	-2.3258
2.2	-67.9667	278.423	-1.5765	-5.2108	0.780703	9.68955e-05	-76.1815	0.67977	0.714	0.859	-2.42373
2.3	-67.9453	278.427	-1.5727	-5.2108	0.780737	6.25587e-05	-76.1403	0.720948	0.719	0.855	-2.52393
2.4	-67.879	278.424	-1.5761	-5.2107	0.780735	-3.51596e-05	-76.0916	0.769674	0.725	0.852	-2.63023
2.5	-67.8154	278.422	-1.5782	-5.2108	0.780702	9.7831e-05	-76.0391	0.822189	0.732	0.847	-2.74288
2.6	-67.705	278.411	-1.5891	-5.2107	0.780736	-3.55043e-05	-75.9853	0.876003	0.749	0.84	-2.88788
2.7	-67.5543	278.392	-1.6077	-5.2106	0.780699	-9.94027e-05	-75.9314	0.929892	0.765	0.841	-3.02669
2.8	-64.8454	277.887	-2.1126	-5.2107	0.780733	-3.31094e-05	-75.8535	1.00778	0.977	1.136	-2.66164
2.9	-64.5423	277.832	-2.1679	-5.2107	0.780698	2.02328e-06	-75.8386	1.02267	0.99	1.178	-2.51815
3	-64.3478	277.797	-2.2029	-5.2108	0.780707	9.34754e-05	-75.8267	1.03463	0.994	1.234	-2.3751
3.25	-64.2093	277.774	-2.2262	-5.2107	0.780731	-3.11426e-05	-75.8094	1.05189	0.993	1.243	-2.19868
3.5	-64.1655	277.766	-2.2337	-5.2107	0.780701	-1.11823e-06	-75.8046	1.05664	0.998	1.269	-2.03241
3.75	-64.0656	277.745	-2.2551	-5.2108	0.780709	9.14468e-05	-75.8164	1.04485	0.996	1.26	-2.00827
4	-63.8593	277.701	-2.2992	-5.2108	0.780701	9.94423e-05	-75.84	1.02129	1.001	1.324	-1.94342
4.25	-63.7563	277.677	-2.323	-5.2108	0.780734	6.5651e-05	-75.861	1.00026	1.001	1.339	-1.97448
4.5	-63.6908	277.662	-2.338	-5.2108	0.780733	6.68563e-05	-75.8737	0.987596	1.002	1.346	-1.97581
4.75	-63.6396	277.651	-2.3492	-5.2108	0.780701	9.92503e-05	-75.8808	0.980461	0.999	1.298	-1.97625
5	-63.596	277.642	-2.3583	-5.2108	0.780731	6.94462e-05	-75.8846	0.976664	1.002	1.366	-1.97601
5.25	-63.5577	277.634	-2.3661	-5.2107	0.780731	-3.08222e-05	-75.8867	0.974573	1.003	1.372	-1.97448
5.5	-63.5221	277.627	-2.3731	-5.2107	0.7807	2.71082e-07	-75.8876	0.973675	1.001	1.357	-1.97602
6	-63.4645	277.615	-2.3845	-5.2107	0.780715	-1.48093e-05	-75.8894	0.971868	1.002	1.385	-1.97359
1.4	-66.9639	278.233	-1.7665	-5.2108	0.780706	9.42786e-05	-76.1688	0.692486	0.657	1.113	0.76006
1.5	-67.0321	278.253	-1.7474	-5.2107	0.780706	-6.46892e-06	-76.1373	0.724001	0.656	1.093	0.87559
1.6	-67.0898	278.27	-1.7301	-5.2107	0.780731	-3.10773e-05	-76.1048	0.75646	0.645	1.088	1.00102
1.7	-67.1217	278.283	-1.7174	-5.2106	0.7807	-9.99699e-05	-76.0704	0.790939	0.627	1.091	1.13268
1.8	-68.1655	278.465	-1.5349	-5.2108	0.780705	9.49135e-05	-76.1635	0.697783	0.422	1.114	2.03329
1.9	-68.306	278.491	-1.5089	-5.2108	0.780736	6.43813e-05	-76.1686	0.69272	0.4	1.11	2.13536
2	-68.4075	278.513	-1.4869	-5.2108	0.780735	6.54732e-05	-76.1554	0.705854	0.381	1.105	2.23287
2.1	-68.4679	278.53	-1.4696	-5.2108	0.780701	9.91652e-05	-76.1257	0.735606	0.365	1.104	2.32929
2.2	-68.4949	278.544	-1.4561	-5.2108	0.780735	6.54289e-05	-76.0823	0.778974	0.357	1.1	2.42113

## Sheet: Ag28 corrosion
Ag28 1.00V			*Total charge of the cell is the negative of the net number of electrons.						Partial charges
Distance (z, Å)	Electronic Energy (eV)	No. of electrons	Net No. electrons	Fermi Level (eV)	Fermi_SHIFT (eV)	Voltage (V)	Free Energy (G, eV)	ΔG (eV)	Solvation shell	Bulk	Horizontal Drift (Å)		*Sum of solvation shell charge and bullk charge is equal to total cell charge.
0	-64.4868	320.31	-3.6898	-6.3376	0.9076	1	-87.8713	0	0.69	2.999	0
0.1	-64.4339	320.302	-3.6977	-6.3376	0.9076	1	-87.8684	0.002813	0.703	2.994	-0.018
0.2	-64.3697	320.295	-3.7051	-6.3376	0.9076	1	-87.8511	0.020147	0.712	2.995	-0.042
0.3	-64.3068	320.289	-3.7108	-6.3376	0.9076	1	-87.8244	0.046902	0.721	2.991	-0.076
0.4	-64.2307	320.282	-3.7178	-6.3376	0.9076	1	-87.7926	0.078625	0.732	2.986	-0.115
0.5	-64.1695	320.278	-3.7221	-6.3376	0.9076	1	-87.7587	0.112588	0.738	2.985	-0.163
0.6	-64.1085	320.274	-3.7263	-6.3376	0.9076	1	-87.7243	0.147002	0.752	2.974	-0.202
0.7	-64.0473	320.269	-3.7306	-6.3376	0.9076	1	-87.6903	0.18095	0.764	2.968	-0.251
0.8	-63.9772	320.264	-3.7365	-6.3376	0.9076	1	-87.6577	0.213578	0.775	2.962	-0.299
0.9	-63.9027	320.257	-3.7434	-6.3376	0.9076	1	-87.6269	0.244359	0.791	2.951	-0.343
1	-63.8326	320.25	-3.7499	-6.3376	0.9076	1	-87.598	0.273296	0.803	2.947	-0.398
1.1	-63.7315	320.238	-3.7615	-6.3375	0.9076	0.9999	-87.57	0.301271	0.819	2.944	-0.441
1.2	-63.6053	320.223	-3.7773	-6.3376	0.9076	1	-87.5443	0.326936	0.835	2.941	-0.484
1.3	-63.4769	320.206	-3.7937	-6.3375	0.9076	0.9999	-87.5195	0.351751	0.855	2.94	-0.527
1.4	-63.3074	320.183	-3.8169	-6.3376	0.9076	1	-87.4974	0.373833	0.872	2.943	-0.559
1.5	-63.0977	320.153	-3.8468	-6.3376	0.9076	1	-87.4771	0.394112	0.914	2.929	-0.561
1.6	-62.8152	320.111	-3.8888	-6.3376	0.9076	1	-87.4609	0.410392	0.927	2.964	-0.496
1.7	-62.1035	319.993	-4.0072	-6.3376	0.9076	1	-87.4995	0.371715	0.993	3.014	0.803
1.8	-62.0709	319.986	-4.0141	-6.3375	0.9076	0.9999	-87.5102	0.361006	0.993	3.024	0.836
1.9	-62.0374	319.979	-4.0212	-6.3376	0.9076	1	-87.5222	0.349062	0.994	3.024	0.862
2	-62.0071	319.972	-4.0276	-6.3375	0.9076	0.9999	-87.532	0.339256	1.006	3.022	0.879
2.1	-61.9684	319.965	-4.0354	-6.3375	0.9076	0.9999	-87.5428	0.328484	0.994	3.039	0.882
2.2	-61.9277	319.957	-4.0433	-6.3376	0.9076	1	-87.5525	0.318705	0.995	3.048	0.892
2.3	-61.8918	319.95	-4.0504	-6.3375	0.9076	0.9999	-87.5612	0.310073	0.994	3.057	0.896
2.4	-61.8604	319.943	-4.0567	-6.3376	0.9076	1	-87.5701	0.301152	0.995	3.061	0.896
2.5	-61.8304	319.937	-4.0627	-6.3376	0.9076	1	-87.5782	0.293097	0.993	3.068	0.896
2.6	-61.795	319.93	-4.0695	-6.3376	0.9076	1	-87.5859	0.285399	0.994	3.077	0.899
2.7	-61.7481	319.922	-4.0784	-6.3376	0.9076	1	-87.5954	0.275898	0.994	3.085	0.96
2.8	-61.5427	319.882	-4.1177	-6.3376	0.9076	1	-87.639	0.232234	0.997	3.121	2.092
2.9	-61.4909	319.872	-4.128	-6.3376	0.9076	1	-87.6525	0.218718	0.998	3.131	2.093
3	-61.4447	319.863	-4.1371	-6.3376	0.9076	1	-87.6639	0.207317	0.998	3.139	2.091
3.25	-61.347	319.844	-4.1563	-6.3376	0.9076	1	-87.688	0.183278	0.996	3.158	2.092
3.5	-61.2641	319.828	-4.1723	-6.3375	0.9076	0.9999	-87.7061	0.165191	0.997	3.171	2.09
3.75	-61.188	319.814	-4.1864	-6.3376	0.9076	1	-87.7197	0.15157	1.003	3.185	2.086
4	-61.1234	319.802	-4.1983	-6.3376	0.9076	1	-87.7305	0.140744	1.007	3.191	2.082
4.25	-61.0663	319.791	-4.2086	-6.3375	0.9076	0.9999	-87.7383	0.132965	1.007	3.197	2.083
4.5	-61.0158	319.782	-4.2177	-6.3375	0.9076	0.9999	-87.7455	0.125775	1.009	3.209	2.083
4.75	-60.9736	319.775	-4.2254	-6.3375	0.9076	0.9999	-87.7521	0.119156	1.009	3.217	2.083
5	-60.9375	319.768	-4.232	-6.3375	0.9076	0.9999	-87.7578	0.113493	1.008	3.224	2.083
5.25	-60.9072	319.762	-4.2376	-6.3375	0.9076	0.9999	-87.763	0.108227	1.008	3.228	2.083
5.5	-60.8811	319.758	-4.2424	-6.3375	0.9076	0.9999	-87.7673	0.103952	1.01	3.233	2.083
6	-60.8399	319.75	-4.2501	-6.3376	0.9076	1	-87.7753	0.095957	1.01	3.241	2.083
Ag28 0.00V									Partial charges
Distance (z, Å)	Electronic Energy (eV)	No. of electrons	Net No. electrons	Fermi Level (eV)	Fermi_SHIFT (eV)	Voltage (V)	Free Energy (G, eV)	ΔG (eV)	Solvation shell	Bulk	Horizontal Drift (Å)
0	-75.7914	322.242	-1.7579	-5.3376	0.9076	0	-85.1744	0	0.502	1.257	0
0.1	-75.7106	322.23	-1.7703	-5.3375	0.9076	-0.0001	-85.1595	0.01486	0.528	1.242	-0.014
0.2	-75.6221	322.218	-1.7819	-5.3375	0.9076	-0.0001	-85.133	0.041395	0.555	1.226	-0.035
0.3	-75.5228	322.206	-1.7938	-5.3376	0.9076	0	-85.0974	0.077035	0.571	1.223	-0.07
0.4	-75.4406	322.198	-1.8018	-5.3376	0.9076	0	-85.0579	0.116509	0.59	1.212	-0.115
0.5	-75.3401	322.187	-1.8128	-5.3376	0.9076	0	-85.0161	0.158301	0.618	1.192	-0.161
0.6	-75.2635	322.181	-1.8193	-5.3376	0.9076	0	-84.9742	0.200239	0.617	1.202	-0.215
0.7	-75.2194	322.18	-1.82	-5.3375	0.9076	-0.0001	-84.9337	0.240752	0.632	1.191	-0.27
0.8	-75.1723	322.178	-1.8216	-5.3375	0.9076	-0.0001	-84.8951	0.279319	0.642	1.176	-0.327
0.9	-75.1957	322.19	-1.8104	-5.3376	0.9076	0	-84.8588	0.315556	0.654	1.156	-0.393
1	-75.2883	322.213	-1.7868	-5.3382	0.9076	0.0006	-84.8266	0.347824	0.674	1.112	-0.463
1.1	-75.3806	322.236	-1.7638	-5.338	0.9076	0.0004	-84.7957	0.378669	0.671	1.093	-0.538
1.2	-75.5189	322.267	-1.733	-5.3376	0.9076	0	-84.769	0.405428	0.678	1.055	-0.628
1.3	-75.5993	322.286	-1.7137	-5.3376	0.9076	0	-84.7464	0.428054	0.68	1.032	-0.727
1.4	-75.6281	322.295	-1.7046	-5.3376	0.9076	0	-84.7265	0.447872	0.685	1.018	-0.83
1.5	-75.6791	322.308	-1.6924	-5.3375	0.9076	-0.0001	-84.7123	0.46208	0.687	1.007	-0.985
1.6	-75.679	322.31	-1.6901	-5.3375	0.9076	-0.0001	-84.6999	0.474501	0.697	0.995	-1.14
1.7	-75.6895	322.313	-1.6866	-5.3375	0.9076	-0.0001	-84.6917	0.482719	0.707	0.978	-1.362
1.8	-75.7124	322.318	-1.6823	-5.3376	0.9076	0	-84.6918	0.482587	0.713	0.969	-1.757
1.9	-75.7129	322.319	-1.6808	-5.3375	0.9076	-0.0001	-84.6841	0.490265	0.721	0.958	-2.013
2	-75.6585	322.315	-1.6851	-5.3375	0.9076	-0.0001	-84.6527	0.521727	0.726	0.959	-2.015
2.1	-75.5523	322.302	-1.6977	-5.3375	0.9076	-0.0001	-84.6138	0.560595	0.737	0.957	6.325
2.2	-75.4302	322.289	-1.7113	-5.3375	0.9076	-0.0001	-84.5643	0.610101	0.75	0.965	6.307
2.3	-72.8827	321.818	-2.182	-5.3379	0.9076	0.0003	-84.53	0.644443	0.986	1.193	5.628
2.4	-72.6444	321.774	-2.2265	-5.3384	0.9076	0.0008	-84.5304	0.644049	1.005	1.221	5.643
2.5	-72.5384	321.753	-2.2466	-5.3377	0.9076	0.0001	-84.5301	0.644314	1.01	1.234	5.685
2.6	-72.4512	321.737	-2.2632	-5.3375	0.9076	-0.0001	-84.5311	0.643335	1.014	1.252	5.725
2.7	-72.401	321.727	-2.2729	-5.3375	0.9076	-0.0001	-84.5326	0.641838	1.011	1.261	5.702
2.8	-72.3592	321.719	-2.2807	-5.3375	0.9076	-0.0001	-84.5324	0.642015	1.01	1.272	5.695
2.9	-72.3402	321.716	-2.2837	-5.3375	0.9076	-0.0001	-84.5294	0.644974	1.008	1.276	5.704
3	-72.3163	321.713	-2.2873	-5.3376	0.9076	0	-84.525	0.649425	1.012	1.274	5.725
3.25	-72.3076	321.715	-2.2848	-5.3375	0.9076	-0.0001	-84.5027	0.671721	0.998	1.288	5.768
3.5	-72.6297	321.78	-2.22	-5.3375	0.9076	-0.0001	-84.4789	0.695469	0.994	1.228	5.847
3.75	-72.609	321.774	-2.2257	-5.3375	0.9076	-0.0001	-84.4887	0.68572	0.99	1.236	5.83
4	-72.5337	321.757	-2.2433	-5.3375	0.9076	-0.0001	-84.5073	0.667124	0.996	1.248	5.831
4.25	-72.4969	321.747	-2.2526	-5.3375	0.9076	-0.0001	-84.5201	0.654285	0.994	1.255	5.832
4.5	-72.4674	321.741	-2.2592	-5.3376	0.9076	0	-84.5261	0.648278	0.995	1.265	5.832
4.75	-72.4419	321.736	-2.2645	-5.3376	0.9076	0	-84.5289	0.645533	0.996	1.266	5.832
5	-72.4183	321.731	-2.269	-5.3376	0.9076	0	-84.5293	0.645088	0.998	1.275	5.834
5.25	-72.3974	321.727	-2.273	-5.3375	0.9076	-0.0001	-84.5295	0.644896	0.999	1.275	5.834
5.5	-72.3766	321.723	-2.2769	-5.3376	0.9076	0	-84.5298	0.644633	0.999	1.28	5.834
6	-72.3465	321.717	-2.2826	-5.3375	0.9076	-0.0001	-84.5299	0.644546	0.996	1.283	5.834

## Sheet: Hydration Energy
Design of the hybrid solvation model
No. H2O	Ag+ (Eh)	nH2O (Eh)	[Ag(H2O)n]+ (Eh)	PCM Hydration Energy (eV)	Total solvation energy (eV)
1	-146.759	-76.446	-223.226	0.582524	4.06304
2	-146.759	-152.897	-299.697	1.11381	4.59433
3	-146.759	-229.35	-376.155	1.26226	4.74277
4	-146.759	-305.808	-452.609	1.17236	4.65287
5	-146.759	-382.262	-529.062	1.13345	4.61397
6	-146.759	-458.714	-605.521	1.30869	4.78921
8	-146.759	-611.633	-758.431	1.06571	4.54623
	Ag+(Eh)	Ag+ in PCM (Eh)		PCM Energy (eV)
	-146.631	-146.759		3.48052
Level of Theory
Structure Optimization		wB97M-v/def2-SVPD
Single Point Calculation		wB97M-v/def2-TZVPPD
Involves effective core potentials def2-ecp
Notes
The PCM Hydration Energy column corresponds to $\Delta E_\text{hydration}^\text{PCM}$ in the Supporting Information. (Table S1)
The total solvation Energy (eV) corresponds to the total energy gain given to Ag+ by both PCM and two explicit wateres.

## Sheet: Ag25 BV Fit
Butler-Volmer model Linear Fit
Voltage (V)	Forward Reaction Energy (eV)			Voltage (V)	Overpotential (V)	Forward Activation Barrier (eV)
0	0.529173			0	-0.682086	0.592294
0.25	0.330496			0.25	-0.432086	0.449883
0.5	0.108585			0.5	-0.182086	0.279218
0.75	-0.06912			0.75	0.067914	0.151391
1	-0.213028			1	0.317914	0.067556
Linear fit results				Linear fit results					Linear fit results
Equilibrium electrode potential ($\Phi_\text{eqb}$)				Equilibrium activation barrier ($\Delta G_\text{eqb}^\ddag$)					Transfer Coefficient ($\alpha_\text{C}$)
0.682086				0.20989					0.54
R^2	0.994118			R^2	0.986856				R^2	0.995
Residuals	0.0151482			Residuals	0.014632				Residuals	0.014632
	0.004873				0.0070178					0.0070178
	-0.0286362				-0.0288504					-0.0288504
	-0.0179394				-0.0218806					-0.0218806
	0.0265544				0.0290812					0.0290812
*** The obtained equilibrium electrode potential and equilibrium activation barrier values are fit to Eqn (1) of main text to obtain transfer coefficient.

## Sheet: Fully Implicit Ag25
Fully Implicit Ag25			Partial charges
1.00 V	Free Energy (eV)	ΔG (eV)	Solv. shell	Bulk	Sum of nearest neighbors
0	-51.8135	0	0.769	2.791	0.387
0.25	-51.6776	0.135842	0.8	2.815	0.444
0.5	-51.5209	0.292614	0.854	2.811	0.505
0.75	-51.4021	0.411409	0.932	2.818	0.599
1	-51.3635	0.449984	1.006	2.947	0.793
1.25	-51.398	0.415441	1.028	3.051	0.988
1.5	-51.4707	0.342736	1.031	3.123	1.151
1.75	-51.5421	0.271344	1.027	3.162	1.228
2	-51.5852	0.228305	1.024	3.174	1.256
2.25	-51.6091	0.204348	1.021	3.196	1.278
2.5	-51.6258	0.187706	1.019	3.201	1.292
2.75	-51.6369	0.176619	1.017	3.211	1.308
3	-51.6462	0.167276	1.015	3.219	1.318
3.5	-51.6606	0.152913	1.013	3.232	1.335
4	-51.6729	0.140622	1.011	3.243	1.346
5	-51.6895	0.12393	1.01	3.252	1.36
6	-51.7011	0.112418	1.01	3.256	1.368
			Partial charges
0.75 V	Free Energy (eV)	ΔG (eV)	Solv. shell	Bulk	Sum of nearest neighbors
0	-50.9998	0	0.672	2.193	0.169
0.25	-50.8439	0.155896	0.707	2.233	0.219
0.5	-50.6589	0.340885	0.78	2.299	0.29
0.75	-50.5135	0.486274	0.882	2.389	0.409
1	-50.442	0.55781	0.97	2.471	0.558
1.25	-50.4426	0.557167	1.016	2.551	0.734
1.5	-50.492	0.50782	1.027	2.634	0.9
1.75	-50.5532	0.446639	1.026	2.677	0.996
2	-50.5925	0.407335	1.023	2.697	1.027
2.25	-50.6146	0.385251	1.021	2.708	1.048
2.5	-50.6285	0.371338	1.018	2.722	1.064
2.75	-50.6387	0.361089	1.017	2.733	1.078
3	-50.6461	0.353727	1.015	2.735	1.088
3.5	-50.6583	0.341512	1.013	2.749	1.104
4	-50.6685	0.331307	1.012	2.757	1.116
5	-50.6829	0.316889	1.01	2.771	1.128
6	-50.6929	0.306957	1.01	2.776	1.136
			Partial charges
0.50 V	Free Energy (eV)	ΔG (eV)	Solv. shell	Bulk	Sum of nearest neighbors
0	-50.383	0	0.549	1.655	0.026
0.25	-50.2158	0.167216	0.572	1.658	0.05
0.5	-50.0028	0.380214	0.615	1.664	0.075
0.75	-49.7991	0.583854	0.708	1.709	0.127
1	-49.6596	0.723352	0.877	1.862	0.277
1.25	-49.6134	0.76961	0.991	2.054	0.49
1.5	-49.6388	0.744229	1.021	2.157	0.666
1.75	-49.6871	0.695896	1.024	2.206	0.771
2	-49.7223	0.660708	1.022	2.226	0.808
2.25	-49.7411	0.641882	1.02	2.236	0.828
2.5	-49.7534	0.629574	1.018	2.248	0.844
2.75	-49.7615	0.621498	1.016	2.258	0.856
3	-49.7675	0.615527	1.015	2.265	0.868
3.5	-49.7774	0.605631	1.013	2.273	0.882
4	-49.7852	0.597777	1.012	2.284	0.892
5	-49.7974	0.585566	1.01	2.291	0.904
6	-49.8059	0.577038	1.01	2.302	0.91
			Partial charges
0.25 V	Free Energy (eV)	ΔG (eV)	Solv. shell	Bulk	Sum of nearest neighbors
0	-49.921	0	0.373	1.068	-0.152
0.25	-49.7506	0.170379	0.374	1.069	-0.128
0.5	-49.5212	0.399718	0.413	1.078	-0.114
0.75	-49.2905	0.63044	0.512	1.117	-0.088
1	-49.1009	0.820084	0.661	1.165	-0.03
1.25	-48.9592	0.961792	0.814	1.214	0.059
1.5	-48.9153	1.00564	0.986	1.522	0.344
1.75	-48.9393	0.981638	1.014	1.643	0.504
2	-48.9662	0.954752	1.017	1.676	0.557
2.25	-48.9814	0.939573	1.017	1.701	0.584
2.5	-48.9906	0.930412	1.016	1.723	0.604
2.75	-48.9958	0.92515	1.015	1.737	0.62
3	-49	0.920942	1.014	1.75	0.632
3.5	-49.0071	0.913891	1.013	1.768	0.651
4	-49.013	0.908015	1.011	1.781	0.664
5	-49.0225	0.898466	1.01	1.807	0.68
6	-49.0298	0.891174	1.01	1.824	0.692
			Partial charges
0.00 V	Free Energy (eV)	ΔG (eV)	Solv. shell	Bulk	Sum of nearest neighbors
0	-49.6236	0	0.293	0.704	-0.251
0.25	-49.4524	0.171179	0.286	0.716	-0.227
0.5	-49.2188	0.404808	0.285	0.717	-0.212
0.75	-48.9728	0.650795	0.295	0.715	-0.203
1	-48.7413	0.882229	0.34	0.709	-0.198
1.25	-48.5429	1.0807	0.469	0.718	-0.182
1.5	-48.4169	1.20663	0.823	0.827	-0.039
1.75	-48.3772	1.24635	0.97	0.92	0.14
2	-48.3852	1.23838	1	0.984	0.236
2.25	-48.3929	1.23065	1.006	1	0.268
2.5	-48.3965	1.22704	1.008	1.012	0.286
2.75	-48.398	1.22555	1.01	1.023	0.3
3	-48.399	1.22455	1.01	1.029	0.308
3.5	-48.4013	1.22223	1.011	1.042	0.324
4	-48.4034	1.22019	1.011	1.046	0.334
5	-48.4087	1.21485	1.01	1.058	0.344
6	-48.4125	1.21105	1.01	1.074	0.352

## Sheet: Dispersion Test
All energy units in electron-volts (eV)
Distance (z, Å)	1.00V D3 Free Energy	0.75V D3 Free Energy	0.50V D3 Free Energy	0.25V D3 Free Energy	0.00V D3 Free Energy	1.00V D3 ΔG	0.75V D3 ΔG	0.50V D3 ΔG	0.25V D3 ΔG	0.00V D3 ΔG
0	-70.4103	-74.1381	-77.8149	-81.461	-84.0442	0	0	0	0	0
0.25	-69.3105	-72.4298	-76.0357	-81.3432	-83.9297	1.09977	1.7083	1.77922	0.117815	0.11449
0.5	-68.8227	-71.8821	-74.6286	-80.9923	-83.4504	1.58754	2.25601	3.18626	0.468717	0.593737
0.75	-68.6496	-71.6363	-74.2881	-77.4879	-82.507	1.76072	2.50177	3.52676	3.9731	1.5372
1	-68.5452	-71.5144	-74.1401	-77.2287	-80.902	1.86509	2.62376	3.67483	4.23225	3.14212
1.25	-68.3504	-71.4547	-74.0609	-77.0943	-80.5934	2.05991	2.68341	3.75403	4.36672	3.45075
1.5	-68.4116	-71.3293	-73.8955	-76.943	-80.4022	1.99873	2.80878	3.91935	4.51803	3.64197
1.75	-67.9582	-70.9111	-73.5851	-76.6545	-80.2093	2.4521	3.22706	4.22975	4.80649	3.83482
2	-67.7042	-70.6348	-73.3407	-76.3482	-80.011	2.70606	3.50331	4.47421	5.11281	4.03312
2.5	-67.4409	-70.3605	-73.0917	-76.0096	-79.7735	2.9694	3.77765	4.72316	5.45141	4.27069
3	-67.2669	-70.1916	-72.9422	-75.813	-79.6456	3.14341	3.94654	4.87268	5.648	4.39856
4	-67.0601	-69.9953	-72.7694	-75.5502	-79.4896	3.3502	4.14278	5.04549	5.91081	4.55454
5	-66.9597	-69.9019	-72.6863	-75.399	-79.4004	3.45061	4.23625	5.12855	6.06203	4.64375
6	-66.9086	-69.8553	-72.6447	-75.3252	-79.3549	3.50172	4.28278	5.1702	6.13582	4.68923
Distance (z, Å)	1.00V TS/HI Free Energy	0.75V TS/HI Free Energy	0.50V TS/HI Free Energy	0.25V TS/HI Free Energy	0.00V TS/HI Free Energy	1.00V TS/HI ΔG	0.75V TS/HI ΔG	0.50V TS/HI ΔG	0.25V TS/HI ΔG	0.00V TS/HI ΔG
0	-62.3844	-66.2973	-70.0947	-73.8424	-76.4937	0	0	0	0	0
0.25	-61.2308	-64.4335	-68.1667	-73.7028	-76.3551	1.15358	1.86377	1.92797	0.139579	0.138568
0.5	-60.7379	-63.8772	-66.6983	-73.3437	-75.8633	1.64654	2.42005	3.39645	0.498743	0.630446
0.75	-60.6047	-63.675	-66.4013	-69.7008	-74.9399	1.77972	2.6223	3.69341	4.14164	1.55379
1	-60.5597	-63.6234	-66.3334	-69.5257	-73.3218	1.82476	2.67391	3.76135	4.31677	3.1719
1.25	-60.6845	-63.6503	-66.3584	-69.4896	-73.0939	1.69993	2.64698	3.73635	4.35278	3.39978
1.5	-59.9321	-63.67	-66.3046	-69.432	-72.9791	2.45232	2.62727	3.79015	4.41042	3.51457
1.75	-60.2777	-63.3104	-66.056	-69.2061	-72.849	2.10675	2.98685	4.03875	4.63635	3.64474
2	-60.054	-63.0638	-65.8434	-68.9322	-72.6867	2.33039	3.23345	4.25127	4.91023	3.80697
2.5	-59.8263	-62.8244	-65.63	-68.6271	-72.4871	2.55814	3.47286	4.46475	5.21531	4.00664
3	-59.6689	-62.672	-65.4972	-68.4459	-72.3771	2.71551	3.62531	4.59755	5.39654	4.11658
4	-59.4743	-62.4879	-65.337	-68.1932	-72.2357	2.91012	3.80937	4.7577	5.64919	4.25805
5	-59.3772	-62.3978	-65.2575	-68.0435	-72.1507	3.00724	3.8995	4.83721	5.79888	4.34298
6	-59.3275	-62.3527	-65.2174	-67.9703	-72.107	3.05695	3.94461	4.87734	5.87215	4.38671
